# Supplementary material
Source: publisher figshare collection journal article supplement (https://sage.figshare.com/ndownloader/files/23770438)
Supplement: Supplementary file 1 [file 23770438]

Reviewer 2 v.1

Comments to the Author

A biomarker to identify patients who are suffering an AECOPD would be extremely useful.

Some major comments regarding the paper:

- I suggest a careful review of English language.
- The term suPAR should be explained in the main text body.
- In Discussion Section: Paragraph 2, line 43 ended by ( are needed to prove it.) it is important to add the reference of this paragraph.
